# Supplementary material for: Integrated hydrogeochemical and multivariate statistical assessment of groundwater in Gashua, Northeastern Nigeria: Implications for arid zone aquifer management
Source: Research Square preprint supplement (doi:10.21203/rs.3.rs-7244113/v1), 2026-01-06
Supplement: Supplementary file 1 [file 09c14b032915548930011786.docx]

| **Parameter** | **ME** | **RMSE** | **r** |
| --- | --- | --- | --- |
| **pH** | 0.076 | 0.487 | -0.019 |
| **EC (µs/cm)** | 10.578 | 228.790 | 0.403 |
| **TH (mg/L as CaCO₃)** | 7.525 | 145.725 | 0.403 |
| **TDS (mg/L)** | 14.833 | 142.734 | 0.556 |
| **Ca²⁺ (mg/L)** | 4.111 | 47.910 | 0.044 |
| **Mg²⁺ (mg/L)** | 0.826 | 7.801 | 0.047 |
| **Na⁺ (mg/L)** | 4.053 | 42.275 | 0.299 |
| **K⁺ (mg/L)** | 0.007 | 0.127 | 0.107 |
| **Cl⁻ (mg/L)** | 3.700 | 50.173 | 0.222 |
| **SO₄²⁻ (mg/L)** | 5.185 | 46.313 | 0.513 |
| **HCO₃⁻ (mg/L)** | 0.642 | 72.747 | -0.034 |

**Table S2:** Leave-one-out cross-validation results of Inverse Distance Weighted (IDW) interpolation showing measured versus predicted values and associated error statistics (ME, RMSE, r)

ME = Mean Error, RMSE = Root-Mean-Square, r = Correlation (Measured vs. Predicted)

| Sample | pH | | |  | EC | | |  | TDS | | |  | TH | | |
| --- | --- | --- | --- | --- | --- | --- | --- | --- | --- | --- | --- | --- | --- | --- | --- |
| G1 | Measured | Predicted | Error | Measured | Predicted | Error | Measured | Predicted | Error | Measured | Predicted | Error |
| G2 | 7.9 | 6.841 | 1.059 | 508 | 538.98 | 30.98 | 325.12 | 350.65 | 25.53 | 420.35 | 296.04 | -124.31 |
| G3 | 6.2 | 6.834 | 0.634 | 962 | 669.95 | -292.05 | 615.68 | 443.32 | -172.36 | 475.8 | 543.96 | 68.16 |
| G4 | 6.7 | 6.984 | 0.284 | 556 | 523.00 | -33.00 | 355.84 | 343.40 | -12.44 | 347.82 | 289.24 | -58.58 |
| G5 | 7.2 | 6.831 | -0.369 | 656 | 622.99 | -33.01 | 419.84 | 388.39 | -31.45 | 96.32 | 367.99 | 271.67 |
| G6 | 6.3 | 7.048 | 0.748 | 453 | 583.97 | 130.97 | 289.92 | 371.83 | 81.91 | 176.3 | 326.05 | 149.75 |
| G7 | 7.5 | 6.736 | -0.764 | 420 | 870.43 | 450.43 | 268.80 | 540.70 | 271.90 | 179.5 | 476.36 | 296.86 |
| G8 | 6.5 | 6.699 | 0.199 | 1200 | 825.56 | -374.44 | 768.00 | 512.08 | -255.92 | 683.6 | 565.94 | -117.66 |
| G9 | 7 | 7.071 | 0.071 | 465 | 557.75 | 92.75 | 297.60 | 359.46 | 61.86 | 196 | 352.28 | 156.28 |
| G10 | 7.3 | 6.725 | -0.575 | 415 | 761.03 | 346.03 | 265.60 | 478.21 | 212.61 | 567.2 | 423.45 | -143.75 |
| G11 | 6.5 | 6.649 | 0.149 | 960 | 988.16 | 28.16 | 614.40 | 585.20 | -29.20 | 690.9 | 519.28 | -171.62 |
| G12 | 7.4 | 7.072 | -0.328 | 586 | 561.77 | -24.23 | 375.04 | 356.78 | -18.26 | 255.6 | 329.13 | 73.53 |
| G13 | 7.1 | 7.160 | 0.060 | 618 | 545.59 | -72.41 | 395.52 | 348.98 | -46.54 | 266.3 | 297.80 | 31.50 |
| G14 | 6.5 | 6.819 | 0.319 | 707 | 751.15 | 44.15 | 452.48 | 482.13 | 29.65 | 628.7 | 492.95 | -135.75 |
| G15 | 6.5 | 7.019 | 0.519 | 515 | 586.87 | 71.87 | 329.60 | 378.89 | 49.29 | 419.8 | 340.26 | -79.54 |
| G16 | 6.8 | 6.636 | -0.164 | 658 | 879.26 | 221.26 | 421.12 | 545.20 | 124.08 | 599.9 | 528.70 | -71.20 |
| G17 | 7.4 | 6.692 | -0.708 | 525 | 733.68 | 208.68 | 336.00 | 469.74 | 133.74 | 492.6 | 453.79 | -38.81 |
| G18 | 7.2 | 6.965 | -0.235 | 433 | 649.66 | 216.66 | 277.12 | 421.72 | 144.60 | 329.8 | 328.49 | -1.31 |
| G19 | 5.7 | 6.860 | 1.160 | 1464 | 763.43 | -700.57 | 936.96 | 480.97 | -455.99 | 470.8 | 511.48 | 40.68 |
| G20 | 7 | 6.863 | -0.137 | 577 | 672.22 | 95.22 | 369.28 | 442.00 | 72.72 | 165.65 | 482.22 | 316.57 |
| G21 | 7.2 | 6.823 | -0.377 | 599 | 706.84 | 107.84 | 383.36 | 460.82 | 77.46 | 628.7 | 379.80 | -248.90 |
| G22 | 6.9 | 6.973 | 0.073 | 684 | 620.83 | -63.17 | 437.76 | 425.71 | -12.05 | 338.4 | 358.35 | 19.95 |
| G23 | 6.8 | 6.884 | 0.084 | 733 | 590.69 | -142.31 | 469.12 | 383.17 | -85.95 | 365.7 | 352.72 | -12.98 |
| G24 | 6.7 | 6.907 | 0.207 | 745 | 609.24 | -135.76 | 476.80 | 401.75 | -75.05 | 351.6 | 444.91 | 93.31 |
| G25 | 6.9 | 6.831 | -0.069 | 432 | 577.60 | 145.60 | 276.48 | 381.11 | 104.63 | 283.8 | 294.94 | 11.14 |
| G1 | 6.8 | 6.861 | 0.061 | 543 | 487.81 | -55.19 | 347.52 | 340.86 | -6.66 | 260.4 | 306.23 | 45.83 |

| Sample | Ca | | | | | |  | Mg | | | | | |  | Na | | | | | |  | K | | | | |
| --- | --- | --- | --- | --- | --- | --- | --- | --- | --- | --- | --- | --- | --- | --- | --- | --- | --- | --- | --- | --- | --- | --- | --- | --- | --- | --- |
| G1 | Measured | | Predicted | | Error | | Measured | | Predicted | | Error | | Measured | | Predicted | | Error | | Measured | | Predicted | | Error |
| G2 | 105 | | 83.895 | | -21.105 | | 38.5 | | 21.861 | | -16.639 | | 180 | | 82.631 | | -97.369 | | 0.36 | | 0.279 | | -0.081 |
| G3 | 128 | | 157.431 | | 29.431 | | 38 | | 38.598 | | 0.598 | | 162 | | 126.807 | | -35.193 | | 0.52 | | 0.325 | | -0.195 |
| G4 | 106 | | 74.728 | | -31.272 | | 20.2 | | 23.642 | | 3.442 | | 98 | | 101.363 | | 3.363 | | 0.41 | | 0.310 | | -0.100 |
| G5 | 21.8 | | 101.440 | | 79.640 | | 10.2 | | 26.824 | | 16.624 | | 83 | | 101.972 | | 18.972 | | 0.28 | | 0.349 | | 0.069 |
| G6 | 41 | | 90.177 | | 49.177 | | 18 | | 21.999 | | 3.999 | | 61.3 | | 107.723 | | 46.423 | | 0.3 | | 0.338 | | 0.038 |
| G7 | 39 | | 136.924 | | 97.924 | | 20 | | 31.252 | | 11.252 | | 58.2 | | 128.352 | | 70.152 | | 0.29 | | 0.376 | | 0.086 |
| G8 | 198 | | 162.411 | | -35.589 | | 46 | | 43.880 | | -2.120 | | 186 | | 128.899 | | -57.101 | | 0.58 | | 0.362 | | -0.218 |
| G9 | 62 | | 97.101 | | 35.101 | | 10 | | 28.621 | | 18.621 | | 48 | | 105.244 | | 57.244 | | 0.28 | | 0.270 | | -0.010 |
| G10 | 158 | | 118.179 | | -39.821 | | 42 | | 32.295 | | -9.705 | | 126 | | 122.903 | | -3.097 | | 0.38 | | 0.381 | | 0.001 |
| G11 | 196 | | 148.343 | | -47.657 | | 49 | | 39.652 | | -9.348 | | 138 | | 129.235 | | -8.765 | | 0.41 | | 0.398 | | -0.012 |
| G12 | 76 | | 93.271 | | 17.271 | | 16 | | 20.856 | | 4.856 | | 51 | | 93.600 | | 42.600 | | 0.18 | | 0.269 | | 0.089 |
| G13 | 77 | | 84.354 | | 7.354 | | 18 | | 17.727 | | -0.273 | | 48 | | 83.163 | | 35.163 | | 0.21 | | 0.242 | | 0.032 |
| G14 | 199 | | 138.170 | | -60.830 | | 32 | | 37.308 | | 5.308 | | 166 | | 126.390 | | -39.610 | | 0.41 | | 0.346 | | -0.064 |
| G15 | 122 | | 92.049 | | -29.951 | | 28 | | 28.333 | | 0.333 | | 108 | | 107.056 | | -0.944 | | 0.18 | | 0.320 | | 0.140 |
| G16 | 176 | | 149.096 | | -26.904 | | 39 | | 38.379 | | -0.621 | | 122 | | 150.918 | | 28.918 | | 0.26 | | 0.456 | | 0.196 |
| G17 | 138 | | 129.783 | | -8.217 | | 36 | | 29.534 | | -6.466 | | 126 | | 124.204 | | -1.796 | | 0.21 | | 0.401 | | 0.191 |
| G18 | 86 | | 93.475 | | 7.475 | | 28 | | 21.621 | | -6.379 | | 102 | | 94.416 | | -7.584 | | 0.16 | | 0.309 | | 0.149 |
| G19 | 126 | | 144.874 | | 18.874 | | 38 | | 40.395 | | 2.395 | | 77 | | 126.862 | | 49.862 | | 0.31 | | 0.386 | | 0.076 |
| G20 | 22.8 | | 141.600 | | 118.800 | | 26.5 | | 31.434 | | 4.934 | | 68.4 | | 127.901 | | 59.501 | | 0.16 | | 0.347 | | 0.187 |
| G21 | 199 | | 103.382 | | -95.618 | | 32 | | 27.269 | | -4.731 | | 166 | | 104.349 | | -61.651 | | 0.41 | | 0.314 | | -0.096 |
| G22 | 96 | | 99.113 | | 3.113 | | 24 | | 23.140 | | -0.860 | | 152 | | 93.450 | | -58.550 | | 0.47 | | 0.291 | | -0.179 |
| G23 | 102 | | 97.288 | | -4.712 | | 27 | | 23.404 | | -3.596 | | 97 | | 107.785 | | 10.785 | | 0.34 | | 0.339 | | -0.001 |
| G24 | 98 | | 124.407 | | 26.407 | | 26 | | 34.803 | | 8.803 | | 101 | | 122.151 | | 21.151 | | 0.52 | | 0.288 | | -0.232 |
| G25 | 84 | | 82.150 | | -1.850 | | 18 | | 19.149 | | 1.149 | | 67 | | 73.203 | | 6.203 | | 0.26 | | 0.223 | | -0.037 |
| G1 | 73 | | 88.738 | | 15.738 | | 19 | | 18.078 | | -0.922 | | 55 | | 77.641 | | 22.641 | | 0.15 | | 0.285 | | 0.135 |
|  | | Cl | | | | | | |  | | SO4 | | | | | | |  | | HCO3 | | | | | | |
| Sample | | Measured | | Predicted | | Error | | | Measured | | Predicted | | | Error | | Measured | | | Predicted | | Error | |
| G1 | | 76 | | 138.01 | | 62.009969 | | | 122.8 | | 120.0459 | | | -2.75411 | | 156.89 | | | 114.8698 | | -42.0202 | |
| G2 | | 152 | | 154.3638 | | 2.3638105 | | | 218 | | 140.1051 | | | -77.8949 | | 229.36 | | | 145.8932 | | -83.4668 | |
| G3 | | 188 | | 102.56 | | -85.43999 | | | 166 | | 110.98 | | | -55.02 | | 147.62 | | | 111.9611 | | -35.6589 | |
| G4 | | 102 | | 121.5701 | | 19.570082 | | | 62 | | 112.3249 | | | 50.3249 | | 64.66 | | | 177.4463 | | 112.7863 | |
| G5 | | 86 | | 132.9605 | | 46.960482 | | | 116 | | 117.3813 | | | 1.381286 | | 58.56 | | | 135.9119 | | 77.35187 | |
| G6 | | 98 | | 130.0329 | | 32.032907 | | | 109 | | 109.8672 | | | 0.867186 | | 68.32 | | | 146.1166 | | 77.79663 | |
| G7 | | 205 | | 148.211 | | -56.78897 | | | 256 | | 148.376 | | | -107.624 | | 363.56 | | | 145.3452 | | -218.215 | |
| G8 | | 122 | | 105.9165 | | -16.08349 | | | 56 | | 121.9635 | | | 65.9635 | | 153.72 | | | 112.1723 | | -41.5477 | |
| G9 | | 99.5 | | 139.7067 | | 40.206745 | | | 96 | | 143.3355 | | | 47.33555 | | 148.84 | | | 183.8221 | | 34.98214 | |
| G10 | | 176 | | 138.8707 | | -37.12925 | | | 177 | | 142.5554 | | | -34.4446 | | 184.22 | | | 175.1852 | | -9.03475 | |
| G11 | | 77 | | 85.25392 | | 8.2539239 | | | 88 | | 101.056 | | | 13.056 | | 81.74 | | | 108.6055 | | 26.86552 | |
| G12 | | 16 | | 96.81723 | | 80.817227 | | | 76 | | 96.2022 | | | 20.2022 | | 70.76 | | | 109.7827 | | 39.02273 | |
| G13 | | 122 | | 148.8043 | | 26.804313 | | | 155 | | 145.1208 | | | 9.879216 | | 124.44 | | | 160.7726 | | 36.33257 | |
| G14 | | 201 | | 99.6817 | | -101.3183 | | | 168 | | 113.9521 | | | -54.0479 | | 119.56 | | | 121.9873 | | 2.427268 | |
| G15 | | 188 | | 148.7365 | | -39.26354 | | | 161 | | 181.6536 | | | 20.65357 | | 124.44 | | | 208.5781 | | 84.13814 | |
| G16 | | 176 | | 127.6854 | | -48.31465 | | | 102 | | 142.6748 | | | 40.67479 | | 129.32 | | | 146.8212 | | 17.50124 | |
| G17 | | 72 | | 103.7462 | | 31.746213 | | | 88 | | 96.54427 | | | 8.544268 | | 112.24 | | | 117.28 | | 5.040032 | |
| G18 | | 98 | | 147.4806 | | 49.480639 | | | 44 | | 156.5743 | | | 112.5743 | | 97.72 | | | 160.4134 | | 62.69344 | |
| G19 | | 36.1 | | 143.8813 | | 107.78132 | | | 108 | | 136.7002 | | | 28.70019 | | 56.12 | | | 140.6677 | | 84.54772 | |
| G20 | | 118 | | 117.1691 | | -0.830921 | | | 155 | | 120.7723 | | | -34.2277 | | 124.44 | | | 123.6669 | | -0.7731 | |
| G21 | | 164 | | 97.16072 | | -66.83928 | | | 85 | | 114.1841 | | | 29.18407 | | 186.66 | | | 102.5385 | | -84.1215 | |
| G22 | | 121 | | 116.8072 | | -4.192826 | | | 97 | | 101.4709 | | | 4.470851 | | 248.88 | | | 117.164 | | -131.716 | |
| G23 | | 130 | | 141.246 | | 11.246011 | | | 113 | | 128.3757 | | | 15.37575 | | 152.5 | | | 136.7505 | | -15.7495 | |
| G24 | | 89 | | 96.25676 | | 7.2567615 | | | 42 | | 68.84603 | | | 26.84603 | | 124.44 | | | 129.9906 | | 5.550554 | |
| G25 | | 78 | | 100.1684 | | 22.168351 | | | 43 | | 62.35237 | | | 19.35237 | | 119.56 | | | 130.8849 | | 11.32489 | |
