# Supplementary material for: Integrated hydrogeochemical and multivariate statistical assessment of groundwater in Gashua, Northeastern Nigeria: Implications for arid zone aquifer management
Source: Research Square preprint supplement (doi:10.21203/rs.3.rs-7244113/v1), 2026-01-06
Supplement: Supplementary file 2 [file 0c6d18d2335fc8843b8d3092.docx]

**Table S1:** Analytical methods, calibration procedures, detection limits, and quality assurance/quality control (QA/QC) protocols for field and laboratory measurements of groundwater physicochemical parameters

| **Parameter** | **Method / Kit** | **Instrument / Model** | **Calibration Standards (values & source)** | **Calibration Frequency** | **Check Standards Used** | **LOD** | **LOQ** | **Duplicate Precision (RSD %)** | **Spike Recovery (%)** | **Blank Type & Frequency** | **Notes** |
| --- | --- | --- | --- | --- | --- | --- | --- | --- | --- | --- | --- |
| **pH** | Electrode (Palintest Micro 800) | Palintest Micro 800 handheld meter | Buffer solutions pH 4.01, 7.00, 10.01 (NIST traceable) | Before/after each sampling day and every 8 hrs | Palintest check solutions | - | - | <1% | N/A | DI water blank daily | Electrode rinsed with DI water; stored in buffer |
| **EC** | Conductivity probe (Palintest Micro 800) | Palintest Micro 800 conductivity sensor | 1413 µS/cm and 12.88 mS/cm (traceable standards) | Daily, start and end of sampling | Palintest conductivity check solutions | ±1 µS/cm | ±2 µS/cm | <2% | N/A | DI water blank daily | Automatic temperature compensation enabled |
| **Ca²⁺** | Reagent tablet method (Palintest) | Lumiso Expert photometer | Palintest Ca standard solutions / SRMs | Daily, and after reagent lot change | NDF neutral density filters | 0.4 mg/L | 1.0 mg/L | <5% | 89–112% | Reagent blanks per 10 samples | Duplicate checks and SRM validation |
| **Mg²⁺** | Reagent tablet method (Palintest) | Lumiso Expert photometer | Palintest Mg standards | Daily | NDF filters | 0.3 mg/L | 0.8 mg/L | <5% | 91–109% | Reagent blanks | Spiked recovery checked in 5% of samples |
| **Na⁺** | Reagent tablet method (Palintest) | Lumiso Expert photometer | Palintest Na standards | Daily | NDF filters | 0.2 mg/L | 0.5 mg/L | <5% | 92–106% | Reagent blanks | Lot numbers and expiry dates recorded |
| **K⁺** | Reagent tablet method (Palintest) | Lumiso Expert photometer | Palintest K standards | Daily | NDF filters | 0.2 mg/L | 0.5 mg/L | <5% | 90–110% | Reagent blanks | Checked against SRM solutions |
| **Cl⁻** | Reagent tablet method (Palintest) | Lumiso Expert photometer | Palintest Cl standards | Daily | NDF filters | 0.2 mg/L | 0.5 mg/L | <5% | 90–108% | Reagent blanks | Verified with duplicate analysis |
| **NO₃⁻** | Reagent tablet method (Palintest) | Lumiso Expert photometer | Palintest nitrate standards | Daily | NDF filters | 0.1 mg/L | 0.3 mg/L | <5% | 88–112% | Reagent blanks | Checked for nitrite interference |
| **SO₄²⁻** | Reagent tablet method (Palintest) | Lumiso Expert photometer | Palintest sulphate standards | Daily | NDF filters | 0.5 mg/L | 1.5 mg/L | <5% | 87–110% | Reagent blanks | Cross-checked with duplicates |
| **HCO₃⁻** | Titration (Palintest acid titration kit) | Palintest digital titration kit / burette | 0.02 N HCl standardised with Na₂CO₃ | Daily standardisation | SRM bicarbonate solution | 0.5 mg/L | 1.5 mg/L | <5% | 90–110% | Titrant blank daily | Ionic balance error check ±5% |
